# Supplementary material for: Urine Untargeted Metabolomic Profiling Is Associated with the Dietary Pattern of Successful Aging among Malaysian Elderly
Source: PubMed Central journal article supplement (PMC7597952; doi:10.3390/nu12102900), 2020-09-23
Supplement: nutrients-12-02900-s001.pdf [file nutrients-12-02900-s001.pdf]

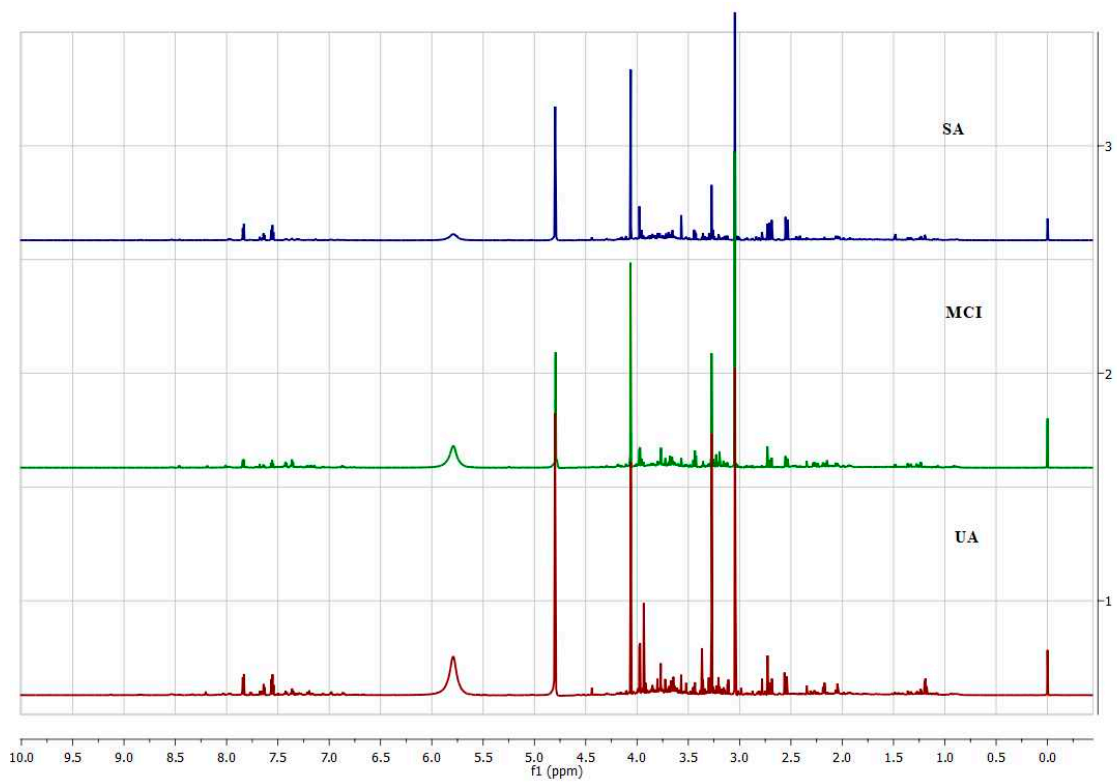

Figure S1 <sup>1</sup>H-NMR spectra (600 MHz) of urine for SA, MCI and UA representatives

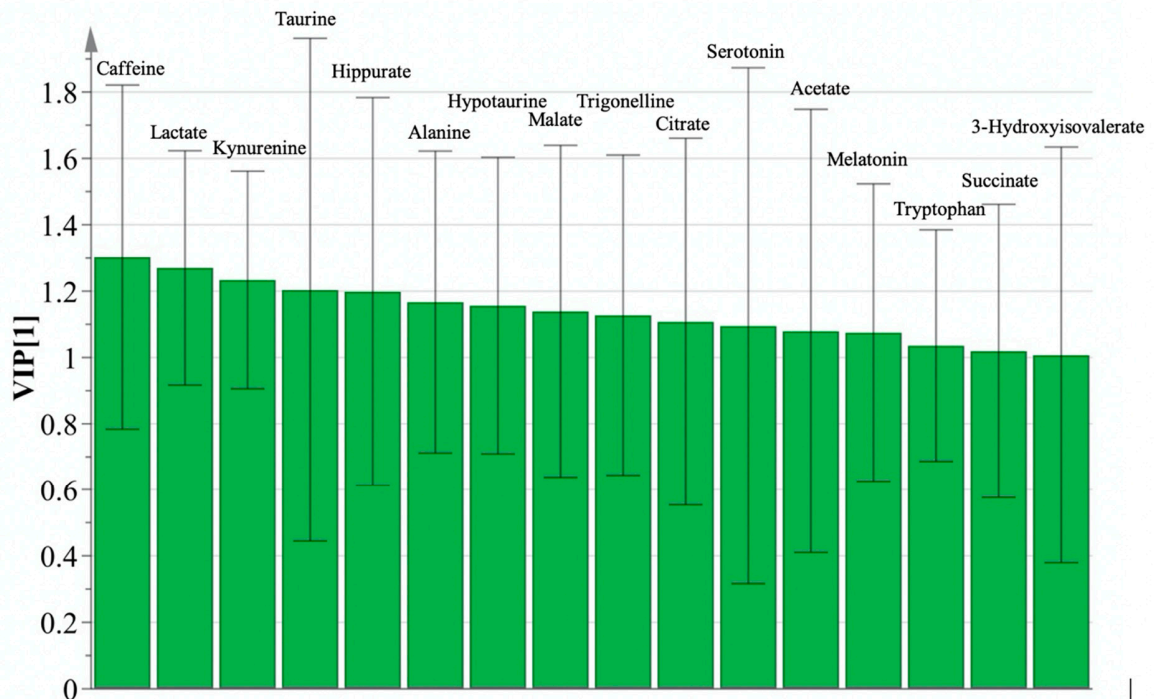

Figure S2 Variable importance of projection for PLS-DA model

| Component | R2X   | R2X(cum) | Eigenvalue | R2Y   | R2Y(cum) | Q2    | Limit Q2 | Q2(cum) | Significance | Iterations |
|-----------|-------|----------|------------|-------|----------|-------|----------|---------|--------------|------------|
| 0         |       | Cent.    |            |       |          |       |          |         |              |            |
| 1         | 0.503 | 0.503    | 13.6       | 0.384 | 0.384    | 0.352 | 0.05     | 0.352   | R1           | 7          |
| 2         | 0.111 | 0.613    | 2.99       | 0.253 | 0.637    | 0.227 | 0.05     | 0.499   | R1           | 6          |

Table S1 Summary of fit for PCA model
